# Supplementary material
Source: publisher site journal article supplement (https://www.dovepress.com/get_supplementary_file.php?f=161379-Table-S2.xlsx)
Supplement: Supplementary file 1 [file get_supplementary_file.php]

## Sheet: Sheet1
Index	TaxonID	Species	Taxonomy Family	Bacteriophage	M14_Controls Counts	M-14 Seq K-mer Score	M16_AgNP Counts	M-16 Seq K-mer Score	M17_AgOAC Counts	M-17 Seq K-mer Score	Log2Fold (AgNP/Control)	Pvalue AgNP/Control	Log2Fold (AgOAC/Control)	Pvalue AgOAC/Control
50	10756	Bacillus phage phi29	Podoviridae	yes	101.149	0.80042	73.3706	0.835418	58.0773	0.835418	-0.46	0.980409	-0.8	0.994601
42	10814	Begomovirus			94.4057	0.553714	15.8844	0.5185	84.8114	0.5185	-2.57	0.167987	-0.15	0.581443
16	28883	Caudovirales			51191.5	0.740471	142538	0.739453	127082	0.739453	1.48	0.188593	1.31	0.0760075
10	35237	dsDNA viruses, no RNA stage			820.993	0.578111	478.043	0.569769	467.384	0.569769	-0.78	0.850673	-0.81	0.998715
37	196242	Enterobacteria phage BP-4795	Siphoviridae	yes	84.2908	0.52125	34.0379	0.568556	47.015	0.568556	-1.31	0.588689	-0.84	0.978665
12	1090133	Enterobacteria phage IME10	Podoviridae	yes	134.865	0.626437	74.8834	0.635619	59.9211	0.635619	-0.85	0.814353	-1.17	0.761747
5	10710	Enterobacteria phage lambda	Siphoviridae	yes	23375.5	0.7446	67395.1	0.747345	60000.3	0.747345	1.53	0.177657	1.36	0.0693363
31	10870	Enterobacteria phage M13	Inoviridae		38933.9	0.594391	16010.7	0.606741	20644.2	0.606741	-1.28	0.602516	-0.92	0.9253
3	1147149	Enterobacteria phage mEp043 c-1	Siphoviridae	yes	80.9192	0.560889	45.3839	0.560643	58.9992	0.560643	-0.83	0.824693	-0.46	0.770602
28	10678	Enterobacteria phage P1	Myoviridae	yes	57.3178	0.799182	24.9611	0.815273	24.8903	0.815273	-1.2	0.640084	-1.2	0.742671
49	1567486	Enterobacteria phage P88	Myoviridae	yes	21.9156	0.5508	6.80758	0.6378	7.3749	0.6378	-1.69	0.427512	-1.57	0.523297
33	374840	Enterobacteria phage phiX174 sensu lato	Microviridae	yes	965900	0.78167	436282	0.782865	568242	0.782865	-1.15	0.66405	-0.77	0.974554
51	10760	Enterobacteria phage T7	Podoviridae	yes	686.127	0.657793	28456.4	0.676162	992.846	0.676162	5.37	9.548073E-5	0.53	0.262321
40	564886	Enterobacteria phage YYZ-2008	Hytrosaviridae		67.4327	0.672263	36.3071	0.70545	39.6401	0.70545	-0.89	0.793772	-0.77	0.974554
11	1173135	Enterococcus phage BC611	Siphoviridae	yes	106.206	0.5615	35.5507	0.6595	24.8903	0.6595	-1.58	0.47134	-2.09	0.282876
39	663241	Enterococcus phage phiEf11	Siphoviridae	yes	62.3752	0.762882	6.80758	0.70725	21.2028	0.70725	-3.2	0.0722274	-1.56	0.528764
29	1458851	Enterococcus phage VD13	Siphoviridae	yes	47.2029	0.530667	34.0379	0.640833	14.7498	0.640833	-0.47	0.985714	-1.68	0.465134
48	1124654	Escherichia phage TL-2011b	Podoviridae	yes	923.827	0.707224	398.622	0.731326	544.821	0.731326	-1.21	0.635335	-0.76	0.967874
45	576791	Escherichia phage wV8	Myoviridae	yes	9159.04	0.581192	5517.92	0.580459	1679.63	0.580459	-0.73	0.876815	-2.45	0.16899
6	1198140	Felixounalikevirus			21694.8	0.650882	15944.1	0.6518	4107.82	0.6518	-0.44	0.969802	-2.4	0.182344
24	32603	Human herpesvirus 6A	Herpesviridae		64.061	0.585	40.0891	0.541	33.187	0.541	-0.68	0.903093	-0.95	0.905362
27	10401	Ictalurid herpesvirus 1	Alloherpesviridae		43.8312	0.508	30.2559	0.532667	31.3433	0.532667	-0.53	0.98245	-0.48	0.783444
47	12417	Lactobacillus phage phiadh	Siphoviridae	yes	10.1149	0.5815	16.6408	0.6065	52.5462	0.6065	0.72	0.418334	2.38	0.0075696
8	139870	Lactobacillus prophage Lj965	Siphoviridae	yes	21.9156	0.543667	19.6663	0.699	58.9992	0.699	-0.16	0.822702	1.43	0.0608117
15	1229751	Lactococcus phage BM13	Siphoviridae	yes	43.8312	0.712063	17.3971	0.650733	22.1247	0.650733	-1.33	0.579553	-0.99	0.878872
32	186765	Lambdalikevirus			206422	0.788133	593220	0.788384	526054	0.788384	1.52	0.179805	1.35	0.0706306
36	10842	Microvirus			3138.99	0.723821	1160.31	0.741924	1867.69	0.741924	-1.44	0.530532	-0.75	0.961197
25	10662	Myoviridae			64.061	0.639	43.8711	0.66788	43.3275	0.66788	-0.55	0.971841	-0.56	0.835372
38	186794	P22likevirus			23.6014	0.517	15.8844	0.61175	4.60931	0.61175	-0.57	0.961238	-2.36	0.193579
23	140410	P2likevirus			13.4865	0.55925	13.6152	0.694	1.84373	0.694	0.01	0.736019	-2.87	0.0841145
4	129861	Phage Gifsy-1	Hytrosaviridae		62.3752	0.831133	46.1403	0.855528	21.2028	0.855528	-0.43	0.9645	-1.56	0.528764
7	129862	Phage Gifsy-2	Hytrosaviridae		10.1149	0.732	1.5128	0.905	1.84373	0.905	-2.74	0.135762	-2.46	0.166409
22	1623298	Phietalikevirus			519.231	0.66755	267.008	0.676222	331.87	0.676222	-0.96	0.758106	-0.65	0.89465
14	10744	Podoviridae			96.0915	0.588786	52.1915	0.633545	39.6401	0.633545	-0.88	0.798904	-1.28	0.692595
30	77775	Salmonella phage FelixO1	Myoviridae	yes	2758	0.564972	2580.83	0.567115	581.695	0.567115	-0.1	0.7918	-2.25	0.22708
21	1623302	Sap6likevirus			927.199	0.634898	442.493	0.642294	329.105	0.642294	-1.07	0.703111	-1.49	0.567827
20	1623304	Sfi21dtunalikevirus			131.494	0.504	196.663	0.539	189.904	0.539	0.58	0.473863	0.53	0.262321
52	10761	Shigella phage Sf6	Podoviridae	yes	38.7738	0.6675	15.8844	0.628	8.29676	0.628	-1.29	0.597891	-2.22	0.236895
2	10699	Siphoviridae			50582.9	0.793951	145345	0.794323	128821	0.794323	1.52	0.179805	1.35	0.0706306
46	398839	Staphylococcus phage CNPH82	Siphoviridae	yes	279.846	0.566257	158.087	0.581055	192.669	0.581055	-0.82	0.829875	-0.54	0.822313
19	1197952	Staphylococcus phage Ipla5	Siphoviridae	yes	20.2298	0.63025	14.3716	0.508	13.8279	0.508	-0.49	0.996326	-0.55	0.828837
26	399185	Staphylococcus phage PH15	Siphoviridae	yes	77.5476	0.580667	36.3071	0.5735	25.8122	0.5735	-1.09	0.693267	-1.59	0.512451
35	1147043	Staphylococcus phage StB20	Siphoviridae	yes	33.7163	0.509	7.56398	0.5	6.45304	0.5	-2.16	0.268714	-2.39	0.185107
44	1208587	Streptococcus phage SPQS1	Siphoviridae	yes	804.135	0.698599	422.07	0.689199	292.23	0.689199	-0.93	0.773333	-1.46	0.584981
13	563769	Stx2-converting phage 1717	Siphoviridae	yes	89.3483	0.697536	41.6019	0.679815	41.4838	0.679815	-1.1	0.688364	-1.11	0.800327
34	379329	Stx2-converting phage 86	Podoviridae	yes	10.1149	0.746	4.53839	0.55275	1.84373	0.55275	-1.16	0.659228	-2.46	0.166409
41	110456	T7likevirus			227.585	0.750965	7303.78	0.7645	323.574	0.7645	5	2.5645152E-4	0.51	0.26952
9	335795	unclassified Lambda-like viruses			131.494	0.683	197.42	0.692867	192.669	0.692867	0.59	0.469767	0.55	0.255256
18	196895	unclassified Podoviridae			30.3447	0.725	21.9355	0.623	28.5777	0.623	-0.47	0.985714	-0.09	0.54748
17	196894	unclassified Siphoviridae			831.108	0.638603	450.057	0.654091	547.586	0.654091	-0.88	0.798904	-0.6	0.861623
43	10239	Viruses			218035	0.574903	146942	0.61326	166368	0.61326	-0.57	0.961238	-0.39	0.726168
1	132475	Yaba-like disease virus			70.8043	0.79	32.5251	0.605667	38.7182	0.605667	-1.12	0.678598	-0.87	0.958629
					1.59916e+06		1.61257e+06		1.61077e+06
